# Supplementary material for: Ceramide Risk Score in the Evaluation of Metabolic Syndrome: An Additional or Substitutive Biochemical Marker in the Clinical Practice?
Source: MDPI journal article supplement (doi:10.3390/ijms241512452), 2023-08-05
Supplement: s1 [file s1]

**Table S1.** Multiple linear regression with ceramides, ceramide ratios or ceramide risk score (CERT1) as dependent variable and WC, SBP/DBP, HOMA-IR, HDL-C and TG (surrogates of IDF diagnostic criteria of metabolic syndrome), and CRP (marker of inflammation) as independent variables.

| <b>Cer 16:0</b>      |                    |                   |          |          |            |
|----------------------|--------------------|-------------------|----------|----------|------------|
|                      | <i>Coefficient</i> | <i>Std. Error</i> | <i>t</i> | <i>P</i> | <i>VIF</i> |
| Constant             | 0.537              | 0.173             | 3.109    | 0.003    |            |
| WC                   | -0.000968          | 0.00107           | -0.907   | 0.367    | 3.476      |
| SBP                  | -0.00186           | 0.00151           | -1.237   | 0.220    | 2.478      |
| DBP                  | 0.00219            | 0.00195           | 1.123    | 0.265    | 2.291      |
| HOMA-IR              | 0.00723            | 0.00646           | 1.119    | 0.267    | 1.864      |
| HDL-C                | 0.000364           | 0.00119           | 0.306    | 0.760    | 2.583      |
| TG                   | 0.000136           | 0.000285          | 0.478    | 0.634    | 1.567      |
| CRP                  | 0.0484             | 0.0237            | 2.039    | 0.045    | 1.380      |
| <b>Cer 18:0</b>      |                    |                   |          |          |            |
|                      | <i>Coefficient</i> | <i>Std. Error</i> | <i>t</i> | <i>P</i> | <i>VIF</i> |
| Constant             | 0.0901             | 0.0664            | 1.356    | 0.179    |            |
| WC                   | 0.00101            | 0.000410          | 2.459    | 0.016    | 3.476      |
| SBP                  | -0.00130           | 0.000579          | -2.250   | 0.027    | 2.478      |
| DBP                  | 0.000601           | 0.000750          | 0.801    | 0.426    | 2.291      |
| HOMA-IR              | 0.00638            | 0.00248           | 2.571    | 0.012    | 1.864      |
| HDL-C                | -0.0000399         | 0.000457          | -0.0872  | 0.931    | 2.583      |
| TG                   | -0.00000781        | 0.000109          | -0.0714  | 0.943    | 1.567      |
| CRP                  | 0.0154             | 0.00913           | 1.683    | 0.096    | 1.380      |
| <b>Cer 24:1</b>      |                    |                   |          |          |            |
|                      | <i>Coefficient</i> | <i>Std. Error</i> | <i>t</i> | <i>P</i> | <i>VIF</i> |
| Constant             | 0.562              | 0.460             | 1.222    | 0.226    |            |
| WC                   | 0.00786            | 0.00284           | 2.765    | 0.007    | 3.476      |
| SBP                  | -0.00956           | 0.00401           | -2.384   | 0.020    | 2.478      |
| DBP                  | 0.00404            | 0.00519           | 0.777    | 0.439    | 2.291      |
| HOMA-IR              | 0.0378             | 0.0172            | 2.201    | 0.031    | 1.864      |
| HDL-C                | 0.00403            | 0.00316           | 1.274    | 0.207    | 2.583      |
| TG                   | 0.000816           | 0.000757          | 1.077    | 0.285    | 1.567      |
| CRP                  | 0.0654             | 0.0632            | 1.034    | 0.304    | 1.380      |
| <b>Cer 24:0</b>      |                    |                   |          |          |            |
|                      | <i>Coefficient</i> | <i>Std. Error</i> | <i>t</i> | <i>P</i> | <i>VIF</i> |
| Constant             | 3.022              | 1.523             | 1.984    | 0.051    |            |
| WC                   | -0.00492           | 0.00941           | -0.523   | 0.603    | 3.476      |
| SBP                  | -0.0213            | 0.0133            | -1.603   | 0.113    | 2.478      |
| DBP                  | 0.0183             | 0.0172            | 1.065    | 0.290    | 2.291      |
| HOMA-IR              | 0.00201            | 0.0569            | 0.0352   | 0.972    | 1.864      |
| HDL-C                | 0.0258             | 0.0105            | 2.458    | 0.016    | 2.583      |
| TG                   | 0.00298            | 0.00251           | 1.190    | 0.238    | 1.567      |
| CRP                  | -0.0728            | 0.209             | -0.348   | 0.729    | 1.380      |
| <b>Cer 16:0/24:0</b> |                    |                   |          |          |            |
|                      | <i>Coefficient</i> | <i>Std. Error</i> | <i>t</i> | <i>P</i> | <i>VIF</i> |
| Constant             | 0.777              | 0.446             | 1.743    | 0.085    |            |
| WC                   | 0.000399           | 0.00276           | 0.145    | 0.885    | 3.476      |
| SBP                  | 0.00467            | 0.00389           | 1.202    | 0.233    | 2.478      |

|         |            |          |         |       |       |
|---------|------------|----------|---------|-------|-------|
| DBP     | -0.0138    | 0.00504  | -2.744  | 0.008 | 2.291 |
| HOMA-IR | 0.00796    | 0.0167   | 0.478   | 0.634 | 1.864 |
| HDL-C   | -0.00341   | 0.00307  | -1.113  | 0.269 | 2.583 |
| TG      | -0.0000362 | 0.000734 | -0.0493 | 0.961 | 1.567 |
| CRP     | 0.0545     | 0.0613   | 0.889   | 0.377 | 1.380 |

---

**Cer 18:0/24:0**

|          | <i>Coefficient</i> | <i>Std. Error</i> | <i>t</i> | <i>P</i> | <i>VIF</i> |
|----------|--------------------|-------------------|----------|----------|------------|
| Constant | 0.0936             | 0.0484            | 1.932    | 0.057    |            |
| WC       | 0.000433           | 0.000299          | 1.447    | 0.152    | 3.476      |
| SBP      | 0.000274           | 0.000422          | 0.648    | 0.519    | 2.478      |
| DBP      | -0.00137           | 0.000547          | -2.503   | 0.014    | 2.291      |
| HOMA-IR  | 0.00316            | 0.00181           | 1.745    | 0.085    | 1.864      |
| HDL-C    | -0.000617          | 0.000333          | -1.852   | 0.068    | 2.583      |
| TG       | -0.0000495         | 0.0000797         | -0.621   | 0.537    | 1.567      |
| CRP      | 0.00703            | 0.00665           | 1.057    | 0.294    | 1.380      |

---

**Cer 24:1/24:0**

|          | <i>Coefficient</i> | <i>Std. Error</i> | <i>t</i> | <i>P</i> | <i>VIF</i> |
|----------|--------------------|-------------------|----------|----------|------------|
| Constant | 0.605              | 0.335             | 1.805    | 0.075    |            |
| WC       | 0.00370            | 0.00207           | 1.786    | 0.078    | 3.476      |
| SBP      | 0.00198            | 0.00292           | 0.677    | 0.500    | 2.478      |
| DBP      | -0.0101            | 0.00379           | -2.661   | 0.009    | 2.291      |
| HOMA-IR  | 0.0195             | 0.0125            | 1.553    | 0.124    | 1.864      |
| HDL-C    | -0.00310           | 0.00231           | -1.344   | 0.183    | 2.583      |
| TG       | -0.0000161         | 0.000552          | -0.0291  | 0.977    | 1.567      |
| CRP      | 0.0432             | 0.0461            | 0.938    | 0.351    | 1.380      |

---

**CERT1**

|          | <i>Coefficient</i> | <i>Std. Error</i> | <i>t</i> | <i>P</i> | <i>VIF</i> |
|----------|--------------------|-------------------|----------|----------|------------|
| Constant | 1.994              | 3.748             | 0.532    | 0.596    |            |
| WC       | 0.0620             | 0.0232            | 2.678    | 0.009    | 3.476      |
| SBP      | -0.0325            | 0.0327            | -0.996   | 0.323    | 2.478      |
| DBP      | -0.00162           | 0.0423            | -0.0383  | 0.970    | 2.291      |
| HOMA-IR  | 0.439              | 0.140             | 3.134    | 0.002    | 1.864      |
| HDL-C    | -0.0324            | 0.0258            | -1.257   | 0.213    | 2.583      |
| TG       | -0.00396           | 0.00617           | -0.641   | 0.523    | 1.567      |
| CRP      | 1.093              | 0.515             | 2.123    | 0.037    | 1.380      |

Note: for abbreviations see the text.
