# Supplementary material for: Ceramide Risk Score in the Evaluation of Metabolic Syndrome: An Additional or Substitutive Biochemical Marker in the Clinical Practice?
Source: MDPI journal article supplement (doi:10.3390/ijms241512452), 2023-08-05
Supplement: s1 [file s1]

**Table S2.** ANOCVA of ceramide risk score (CERT1) with WC, HOMA-IR and/or CRP as covariate/s.

| <b>ANCOVA: adjustment for WC</b>            |            |            |                |
|---------------------------------------------|------------|------------|----------------|
| <i>F</i>                                    | <i>DFH</i> | <i>DFE</i> | <i>P Value</i> |
| 2.312                                       | 2          | 81         | 0.106          |
| <i>Comparison</i>                           | <i>t</i>   | <i>DF</i>  | <i>P Value</i> |
| NW vs. OB-MetS-                             | -1.234     | 81         | 0.221          |
| NW vs. OB-MetS+                             | -2.135     | 81         | 0.036          |
| OB-MetS- vs. OB-MetS+                       | -0.779     | 81         | 0.438          |
| <b>ANCOVA: adjustment for HOMA-IR</b>       |            |            |                |
| <i>F</i>                                    | <i>DFH</i> | <i>DFE</i> | <i>P Value</i> |
| 5.543                                       | 2          | 81         | 0.006          |
| <i>Comparison</i>                           | <i>t</i>   | <i>DF</i>  | <i>P Value</i> |
| NW vs. OB-MetS-                             | -2.616     | 81         | 0.011          |
| NW vs. OB-MetS+                             | -3.050     | 81         | 0.003          |
| OB-MetS- vs. OB-MetS+                       | -0.260     | 81         | 0.795          |
| <b>ANCOVA: adjustment for CRP</b>           |            |            |                |
| <i>F</i>                                    | <i>DFH</i> | <i>DFE</i> | <i>P Value</i> |
| 9.229                                       | 2          | 81         | 0.000          |
| <i>Comparison</i>                           | <i>t</i>   | <i>DF</i>  | <i>P Value</i> |
| NW vs. OB-MetS-                             | -3.130     | 81         | 0.002          |
| NW vs. OB-MetS+                             | -4.071     | 81         | 0.000          |
| OB-MetS- vs. OB-MetS+                       | -0.708     | 81         | 0.481          |
| <b>ANCOVA: adjustment for WC + CRP</b>      |            |            |                |
| <i>F</i>                                    | <i>DFH</i> | <i>DFE</i> | <i>P Value</i> |
| 1.326                                       | 2          | 81         | 0.271          |
| <i>Comparison</i>                           | <i>t</i>   | <i>DF</i>  | <i>P Value</i> |
| NW vs. OB-MetS-                             | -1.160     | 81         | 0.249          |
| NW vs. OB-MetS+                             | -1.555     | 81         | 0.124          |
| OB-MetS- vs. OB-MetS+                       | -0.306     | 81         | 0.760          |
| <b>ANCOVA: adjustment for WC + HOMA-IR</b>  |            |            |                |
| <i>F</i>                                    | <i>DFH</i> | <i>DFE</i> | <i>P Value</i> |
| 0.785                                       | 2          | 81         | 0.459          |
| <i>Comparison</i>                           | <i>t</i>   | <i>DF</i>  | <i>P Value</i> |
| NW vs. OB-MetS-                             | -1.041     | 81         | 0.301          |
| NW vs. OB-MetS+                             | -1.106     | 81         | 0.272          |
| OB-MetS- vs. OB-MetS+                       | -0.002     | 81         | 0.999          |
| <b>ANCOVA: adjustment for CRP + HOMA-IR</b> |            |            |                |
| <i>F</i>                                    | <i>DFH</i> | <i>DFE</i> | <i>P Value</i> |
| 4.009                                       | 2          | 81         | 0.022          |
| <i>Comparison</i>                           | <i>t</i>   | <i>DF</i>  | <i>P Value</i> |
| NW vs. OB-MetS-                             | -2.328     | 81         | 0.022          |
| NW vs. OB-MetS+                             | -2.520     | 81         | 0.014          |
| OB-MetS- vs. OB-MetS+                       | -0.048     | 81         | 0.962          |

Note: for abbreviations see the text.
