# Supplementary material for: Ceramide Risk Score in the Evaluation of Metabolic Syndrome: An Additional or Substitutive Biochemical Marker in the Clinical Practice?
Source: MDPI journal article supplement (doi:10.3390/ijms241512452), 2023-08-05
Supplement: s1 [file s1]

Tab. S3. SCORE CALCULATION: Ceramide Risk Score (CERT1)

| Score Component                                  | Q1 | Q2 | Q3 | Q4 |
|--------------------------------------------------|----|----|----|----|
| <i>Cer 16:0</i>                                  | 0  | 0  | +1 | +2 |
| <i>Cer 18:0</i>                                  | 0  | 0  | +1 | +2 |
| <i>Cer 24:1</i>                                  | 0  | 0  | +1 | +2 |
| <i>Cer 16:0/24:0</i>                             | 0  | 0  | +1 | +2 |
| <i>Cer 18:0/24:0</i>                             | 0  | 0  | +1 | +2 |
| <i>Cer 24:1/24:0</i>                             | 0  | 0  | +1 | +2 |
| <b>CERT1 = sum of the six "score components"</b> |    |    |    |    |

Tab. S4. RISK GROUP DETERMINATION: Ceramide Risk Score (CERT1), Framingham Risk Score (FRS) and Vascular Age (VA)

| Risk Group       | CERT1 | FRS (%)   | VA (years) |
|------------------|-------|-----------|------------|
| <i>Low</i>       | 0-2   | 1.64-3.02 | 17.6-18.6  |
| <i>Moderate</i>  | 3-6   | 3.71-5.78 | 19.1-20.5  |
| <i>Increased</i> | 7-9   | 6.47-7.85 | 21.0-22.0  |
| <i>High</i>      | 10-12 | 8.54-9.92 | 22.5-23.4  |

Tabs. S1-S2. Calculation of ceramide risk score (CERT1) and determination of CVD risk groups (\*). When determining the score for a subject, it is evaluated to which quartile the person belongs with regards to each score component. In particular, CERT1 has six components, and only quartiles 3 and 4 give points. Thus, the scale for this score ranges from 0 to 12 points. Based on this, the subject is categorized to one of the CVD risk categories. Please, note that: (1) the quartiles have been calculated by using all data of the present study; (2) FRS and VA represent the expected values, calculated by using the equations of the corresponding linear regressions of FRS or VA with CERT1. See the text for further details.

\*Hilvo, M.; Meikle, P.J.; Pedersen, E.R.; Tell, G.S.; Dhar, I.; Brenner, H.; Schöttker, B.; Lääperi, M.; Kauhanen, D.; Koistinen, K.M.; et al. Development and validation of a ceramide- and phospholipid-based cardiovascular risk estimation score for coronary artery disease patients. *Eur. Heart J.* **2020**, *41*, 371–380. doi: 10.1093/eurheartj/ehz387.
